# Supplementary material for: Reduction in oxidative stress during cellular responses to chemically functionalised graphene
Source: Royal Society of Chemistry journal article supplement (doi:10.1039/c4tb00478g), 2014-01-01
Supplement: c4tb00478g1.pdf [file c4tb00478g1.pdf]

**Supporting Information**

**Reduction in oxidative stress during cellular responses to chemically  
functionalised graphene**

**Ok Ja Yoon,<sup>a,d,‡</sup> Chang Yong Jung,<sup>a,‡</sup> Il Yung Sohn<sup>a</sup>, Young Min Son<sup>b</sup>, Byeong-Ung  
Hwang<sup>a</sup> and Il Jin Kim,<sup>a</sup> and Nae-Eung Lee,<sup>\*a,b,c</sup>**

<sup>a</sup>*School of Advanced Materials Science and Engineering, Center for Advanced Plasma  
Surface Technology and Center for Human Interface Nanotechnology, Sungkyunkwan  
University (SKKU), Suwon, Kyunggi-do 440-746, Korea. Fax: +82-31-290-7410; Tel: +82-  
31-290-7398; E-mail: nelee@skku.edu (N.-E. Lee)*

<sup>b</sup>*Samsung Advanced Institute for Health Sciences and Technology (SAIHST), Sungkyunkwan  
University (SKKU), Suwon, Kyunggi-do 440-746, Korea*

<sup>c</sup>*SKKU Advanced Institute of Nanotechnology (SAINT), Sungkyunkwan University (SKKU),  
Suwon, Kyunggi-do 440-746, Korea*

<sup>d</sup>*Department of Chemistry, Institute of Innovative Functional Imaging, Chung-Ang University,  
Seoul 156-756, Korea*

<sup>‡</sup> Contributed equally to this work

## Supporting Figure

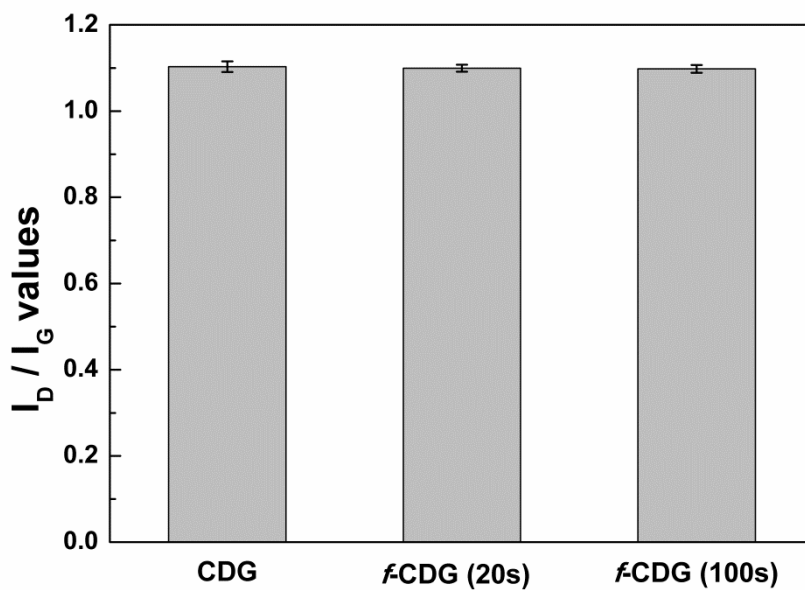

Figure S1. Average  $I_D / I_G$  values with standard deviations obtained from the micro-Raman spectra measured for twenty points on each sample. The error bars indicate standard deviations.

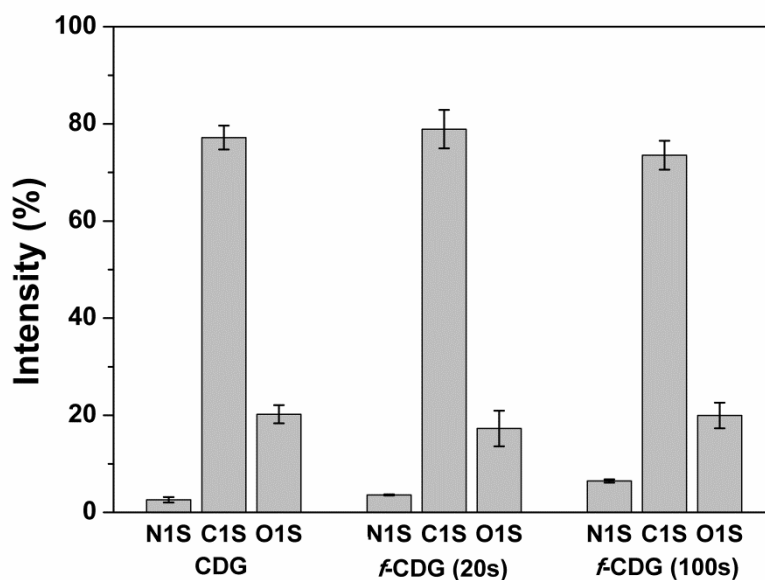

Figure S2. Average C, O and N binding components obtained from three XPS spectra for each sample. Error bars indicate standard deviations.

## Supporting Table

Table S1. The binding component ratio of C, O and N obtained from the spectra of the CDG and *f*-CDG (20 and 100 s) thin films by XPS measurements in Fig. 2.

|   | CDG  | <i>f</i> -CDG (20 s) | <i>f</i> -CDG (100 s) |
|---|------|----------------------|-----------------------|
| C | 82.1 | 84.0                 | 79.5                  |
| O | 16.4 | 12.6                 | 14.7                  |
| N | 1.5  | 3.4                  | 5.8                   |

Table S2. Component ratios from N 1s XPS spectra of CDG, *f*-CDG (20 s), and *f*-CDG (100 s) thin films

| Peak intensity ratios |             |            |             |
|-----------------------|-------------|------------|-------------|
|                       | Pyridinic N | Pyrrolic N | Graphitic N |
|                       | 398.5 eV    | 400.1 eV   | 401.5 eV    |
| CDG                   | 16.8        | 59.7       | 23.5        |
| <i>f</i> -CDG (20s)   | 48.5        | 26.7       | 24.8        |
| <i>f</i> -CDG (100s)  | 62.7        | 22.3       | 15          |

## Supporting Figure

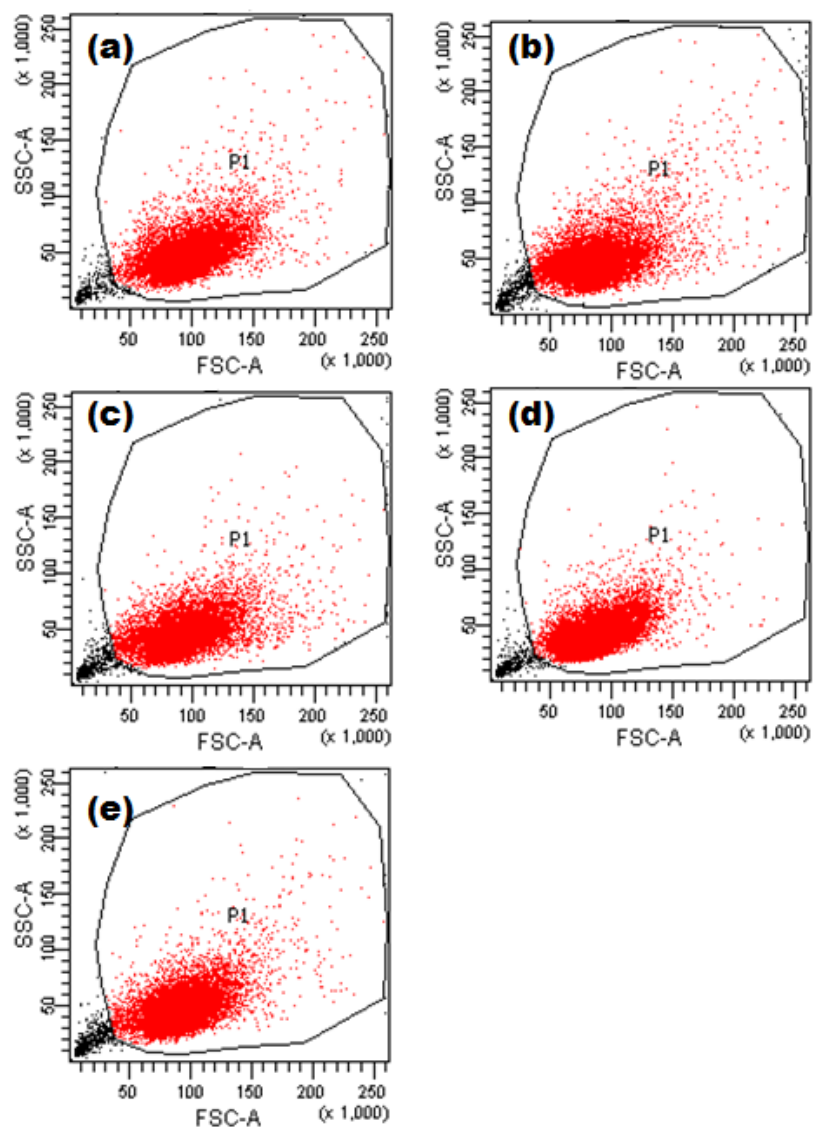

Figure S3. Flow cytometry analysis of ROS generation by SSC-A vs. FSC-A plots on the (a) negative control, (b) CDG, (c) *f*-CDG (20 s), (d) *f*-CDG (100 s) thin films, and (e) positive H<sub>2</sub>O<sub>2</sub> (100 μM) plots.
